# Supplementary material for: Nitrogen form plays an important role in the growth of moso bamboo (Phyllostachys edulis) seedlings
Source: PeerJ. 2020 Sep 16;8:e9938. doi: 10.7717/peerj.9938 (PMC7501804; doi:10.7717/peerj.9938)
Supplement: Supplemental Information 2 — The raw data were used for range, variance and correlation analysis to compare the importance of N form, N and K concentrations on the growth of bamboo seedlings. [file peerj-08-9938-s002.xlsx]

## Sheet: Sheet1
Leaf number
Treatment 1	10	11	12	12	12	11	11		10	13	10	14
Treatment 2	8	9	7	5	7	8	8	8	9	8	8	8
Treatment 3	12	12	12	11	11	11	10	10	11	10	11	11
Treatment 4	9	10	10	11	9	9	10	9	10	9	9	9
Treatment 5	10	11	10	11	11	10	10	7	11	9	10	12
Treatment 6	9	10	8	9	8	7	9	11	9	9	9	10
Treatment 7	12	10	11	11	8	11	13	8	9	11	10	10
Treatment 8	9	7	7	8	7.36364	8	7	7	6	8	8	6
height （cm）
Treatment 1	16.9	17.2	18.5	15.9	19.1	15.5	15.9		17	14.4	14.5	18.2
Treatment 2	12.2	12.8	10.5	10.1	13.4	13.4	13.3	13.9	13.5	14.8	14.9	14.9
Treatment 3	15.2	17.6	17.8	18.6	18.5	17.6	11.7	14.7	16.5	10.8	16.3	13.1
Treatment 4	13.1	15.8	14.5	18.3	12.8	11.1	12.1	15.4	15.1	14.5	15	14.5
Treatment 5	15.6	16.7	11.6	16.2	15.6	13.3	12.2	8.4	12.4	14.8	11.6	16.5
Treatment 6	12.7	15.2	14.2	12	13.5	13.5	12.7	18.1	14.7	14.1	17.9	16.4
Treatment 7	16.3	15.6	14.1	18.7	14.9	16.9	17.5	9.7	14.5	17.1	14.7	17.5
Treatment 8	15.3	13.5	11.5	14.8		14.1	15.6	16.4	13.1	14.7	11.3	12.3
The chlorophyll content (SPAD value)
Treatment 1	19.8	33.1	31.6	35.1	34.9	29.9	21		24.9	16.6	22.2	32.9
Treatment 2	6.6	7.6	5.9	4.7	4.7	1.7	10.2	10.2	7.3	10.9	5.9	6
Treatment 3	20.2	25	23.2	21.6	19.6	28.2	17.3	19.9	25.9	13	17.6	14.7
Treatment 4	8.6	7.8	9.1	7.9	7.7	5.2	4.6	2.3	1.7	8.9	10.8	3.3
Treatment 5	34.3	27.1	9.7	18.1	24	22.4	21.1	22.7	14.6	15	21.4	27.7
Treatment 6	1.8	5	9.5	2.6	5.6	5.1	8.8	6.1	13.1	11.1	13.4	8.9
Treatment 7	34.4	34.3	29	21.1	16.3	23.6	32.9	18.3	13.1	29.5	25.1	27.4
Treatment 8	6.7	15.1	5.3	3.7	5.8	3.3	7.6	2.9	3.4	3.3	5.1	7.4
dry weight（g）
Treatment 1	0.133	0.303	0.293	0.189	0.184	0.259	0.268	0.174	0.164	0.176	0.294
Treatment 2	0.121	0.077	0.061	0.03	0.108	0.083	0.077	0.122	0.115	0.08	0.044	0.062
Treatment 3	0.312	0.226	0.25	0.174	0.121	0.184	0.077	0.156	0.252	0.215	0.266	0.144
Treatment 4	0.149	0.212	0.104	0.081	0.151	0.078	0.147	0.122	0.122	0.134	0.056	0.097
Treatment 5	0.106	0.207	0.104	0.229	0.239	0.17	0.046	0.091	0.214	0.108	0.116	0.09
Treatment 6	0.097	0.08	0.047	0.15	0.15	0.088	0.164	0.13	0.109	0.124	0.062	0.071
Treatment 7	0.168	0.128	0.224	0.203	0.088	0.148	0.102	0.192	0.188	0.274	0.161	0.23
Treatment 8	0.077	0.074	0.083	0.078	0.043	0.076	0.059	0.058	0.072	0.042	0.083
N content （%）
Treatments	0.005mol/LH2SO4 （ml）	N content （%）	N（%）=（V1-V0）×c×14×ts×10-3 ×100/m
0	0.82
1-1	6.92	0.854
1-2	7.46	0.9296
1-3	7.36	0.9156
2-1	6.02	0.728
2-2	7.64	0.9548
3-1	5.94	0.7168
3-2	5.98	0.7224
3-3	5.48	0.6524
4-1	4.64	0.5348
4-2	2.61	0.2506
5-1	8.19	1.0318
5-2	7.35	0.9142
5-3	9.8	1.2572
6-1	4.91	0.5726
6-2	5.26	0.6216
7-1	4.16	0.4676
7-2	3.86	0.4256
7-3	3.72	0.406
8-1	3.61	0.3906
8-2	3.61	0.3906
root total length （cm）
Treatment 1	216.563	432.19	312.346	167.613	260.303	456.06	151.341	366.85	454.142	119.249	289.9
Treatment 2	77.1861	141.285	141.944	107.05	118.442	221.055	166.549	119.768	112.749	71.5134	34.8848	103.317
Treatment 3	342.616	151.928	100.458	228.244	182.361	241.781	236.666	200.959	261.759	284.532	185.354	91.578
Treatment 4	194.428	180.568	199.043	243.022	173.649	210.14	183.185	90.3904	277.637	231.326	118.565	141.399
Treatment 5	104.047	157.479	127.626	55.6368	95.0274	13.2478	28.7482	146.788	76.7883	166.961	61.6861	159.399
Treatment 6	183.1	264.78	145.671	88.7327	267.063	208.346	267.164	179.599	60.374	194.071	143.174	117.521
Treatment 7	321.913	186.857	111.712	210.077	264.504	147.73	85.8732	264.906	181.078	224.004	100.167	256.504
Treatment 8	91.6794	78.2794	110.912	61.0419	58.6233	82.826	109.789	84.9898	70.3766	31.0614	90.0366
root surface area （cm2）
Treatment 1	22.2233	52.332	30.1246	18.1863	28.7322	42.3282	16.6445	35.1559	47.1209	17.0282	28.7935
Treatment 2	10.3454	14.3787	14.8992	14.3167	12.397	22.5507	16.7281	11.6246	10.742	6.4429	2.2595	11.4055
Treatment 3	35.8419	16.2292	13.3861	22.3319	20.8298	26.3194	23.4465	22.6283	37.3965	33.7951	23.2089	10.2977
Treatment 4	17.8799	18.8465	20.6462	22.6506	20.2777	21.8123	17.9471	9.8583	28.5839	20.7991	10.5559	13.1177
Treatment 5	11.8933	19.557	15.7062	6.7962	10.7946	1.8825	3.2591	18.1157	7.5524	20.8549	6.5249	16.1789
Treatment 6	18.7637	25.0529	15.4235	6.9357	30.1495	23.2288	27.4799	18.3061	5.7782	20.1479	14.5979	11.6632
Treatment 7	37.3475	21.6826	12.6117	18.4805	27.1924	18.0461	9.4499	32.0518	19.6606	23.1388	10.1205	25.2642
Treatment 8	10.3666	8.9959	11.9071	7.3697	4.8918	8.3742	12.8249	6.7758	9.0029	2.8779	10.3376
root volume（cm3）
Treatment 1	0.181	0.504	0.231	0.157	0.252	0.313	0.146	0.268	0.389	0.193	0.228
Treatment 2	0.11	0.116	0.124	0.152	0.103	0.183	0.134	0.09	0.081	0.046	0.012	0.1
Treatment 3	0.298	0.138	0.142	0.174	0.189	0.228	0.185	0.203	0.425	0.319	0.231	0.092
Treatment 4	0.131	0.157	0.17	0.168	0.188	0.18	0.14	0.086	0.234	0.149	0.075	0.097
Treatment 5	0.108	0.193	0.154	0.066	0.098	0.021	0.029	0.178	0.059	0.207	0.055	0.131
Treatment 6	0.153	0.189	0.13	0.043	0.271	0.206	0.225	0.148	0.044	0.166	0.118	0.092
Treatment 7	0.345	0.2	0.113	0.129	0.222	0.175	0.083	0.309	0.17	0.19	0.081	0.198
Treatment 8	0.093	0.082	0.102	0.071	0.032	0.067	0.119	0.043	0.092	0.021	0.094
average diameter（cm）
Treatment 1	0.3266	0.3854	0.307	0.3454	0.3513	0.2954	0.3501	0.305	0.3303	0.4545	0.3162
Treatment 2	0.4266	0.3239	0.3341	0.4257	0.3332	0.3247	0.3197	0.309	0.3033	0.2868	0.2062	0.3514
Treatment 3	0.333	0.34	0.4241	0.3114	0.3636	0.3465	0.3153	0.3584	0.4548	0.3781	0.3986	0.3579
Treatment 4	0.2927	0.3322	0.3302	0.2967	0.3717	0.3304	0.3119	0.3472	0.3277	0.2862	0.2834	0.2953
Treatment 5	0.3638	0.3953	0.3917	0.3888	0.3616	0.4523	0.3609	0.3928	0.3131	0.3976	0.3367	0.3231
Treatment 6	0.3262	0.3012	0.337	0.2488	0.3593	0.3549	0.3274	0.3244	0.3046	0.3305	0.3245	0.3159
Treatment 7	0.3693	0.3694	0.3594	0.28	0.3272	0.3888	0.3503	0.3851	0.3456	0.3288	0.3216	0.3135
Treatment 8	0.3599	0.3658	0.3417	0.3843	0.2656	0.3218	0.3718	0.2538	0.4072	0.2949	0.3655
Root tips
Treatment 1	1005	2501	1251	1079	941	2252	742	1575	2321	629	1489
Treatment 2	431	664	675	484	511	1138	874	764	632	379	162	639
Treatment 3	1341	756	421	924	943	1306	1257	720	833	1118	877	488
Treatment 4	1002	991	917	1175	1007	1227	982	486	1500	1484	735	729
Treatment 5	364	512	477	230	353	70	181	556	328	693	325	630
Treatment 6	685	1234	722	435	824	857	1150	904	447	1047	738	703
Treatment 7	1171	673	536	824	879	882	344	1017	726	981	511	1086
Treatment 8	473	358	481	275	298	326	515	454	288	150	473
